# Supplementary material for: Applications of Bayesian network models in predicting types of hematological malignancies
Source: PubMed Central journal article supplement (PMC5934387; doi:10.1038/s41598-018-24758-5), 2018-05-03
Supplement: 41598_2018_24758_MOESM3_ESM.pdf [file 41598_2018_24758_MOESM3_ESM.pdf]

# Applications of Bayesian network models in predicting types of hematological malignancies

**Rupesh Agrahari<sup>1,+</sup>, Amir Foroushani<sup>1,+</sup>, Thomas Roderick Docking<sup>2</sup>, Linda Chang<sup>2</sup>, Gerben Duns<sup>2</sup>, Monika Hudoba<sup>3</sup>, Aly Karsan<sup>2,†</sup>, and Habil Zare<sup>2,†,\*</sup>**

<sup>1</sup>Department of Computer Science, Texas State University, San Marcos, Texas, 78666, USA

<sup>2</sup>Department of Pathology and Laboratory Medicine, British Columbia Cancer Agency, Vancouver, British Columbia, V5Z 4E6, Canada

<sup>3</sup>Department of Pathology and Laboratory Medicine, Vancouver General Hospital, Vancouver, British Columbia, V5Z 1M9, Canada

\*zare@txstate.edu

<sup>+</sup>These authors contributed equally to this work.

<sup>†</sup>These senior authors contributed equally to this work.

## Supplementary File 2: The BN structures obtained from subsampling

The following figures show BN structures learned using eigengenes in the MILE dataset for each of the 5 subsamples. Each BN is the consensus network obtained from the top third of 500 fitted networks. The nodes are colored similar to Fig. 2 in the paper.

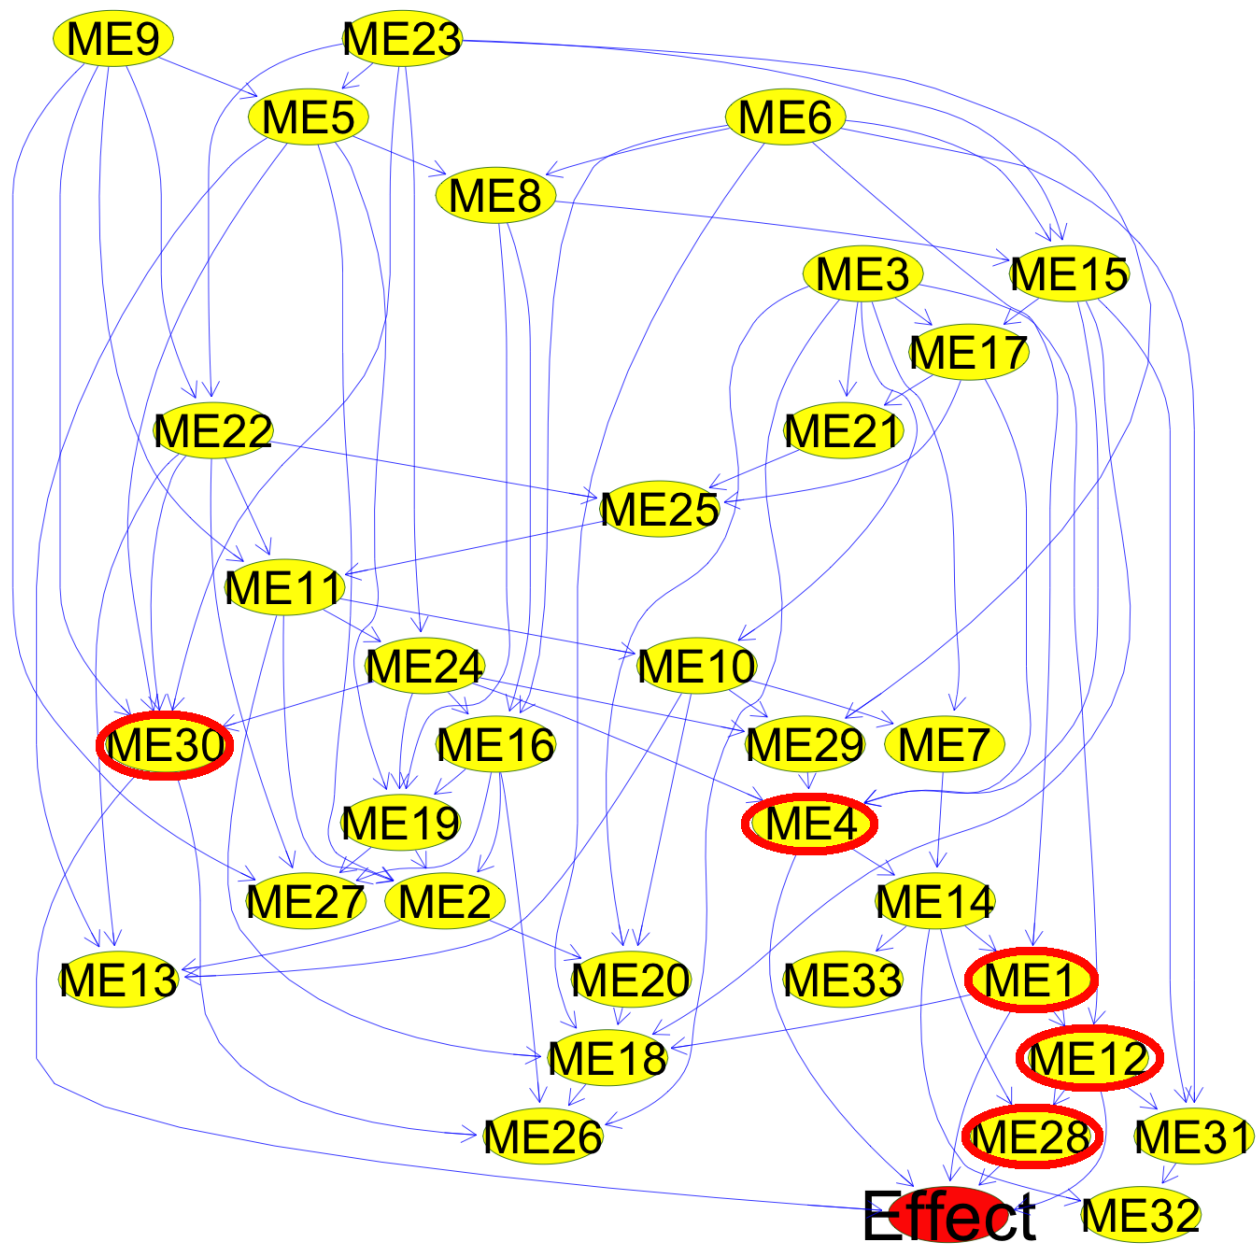

Figure 1

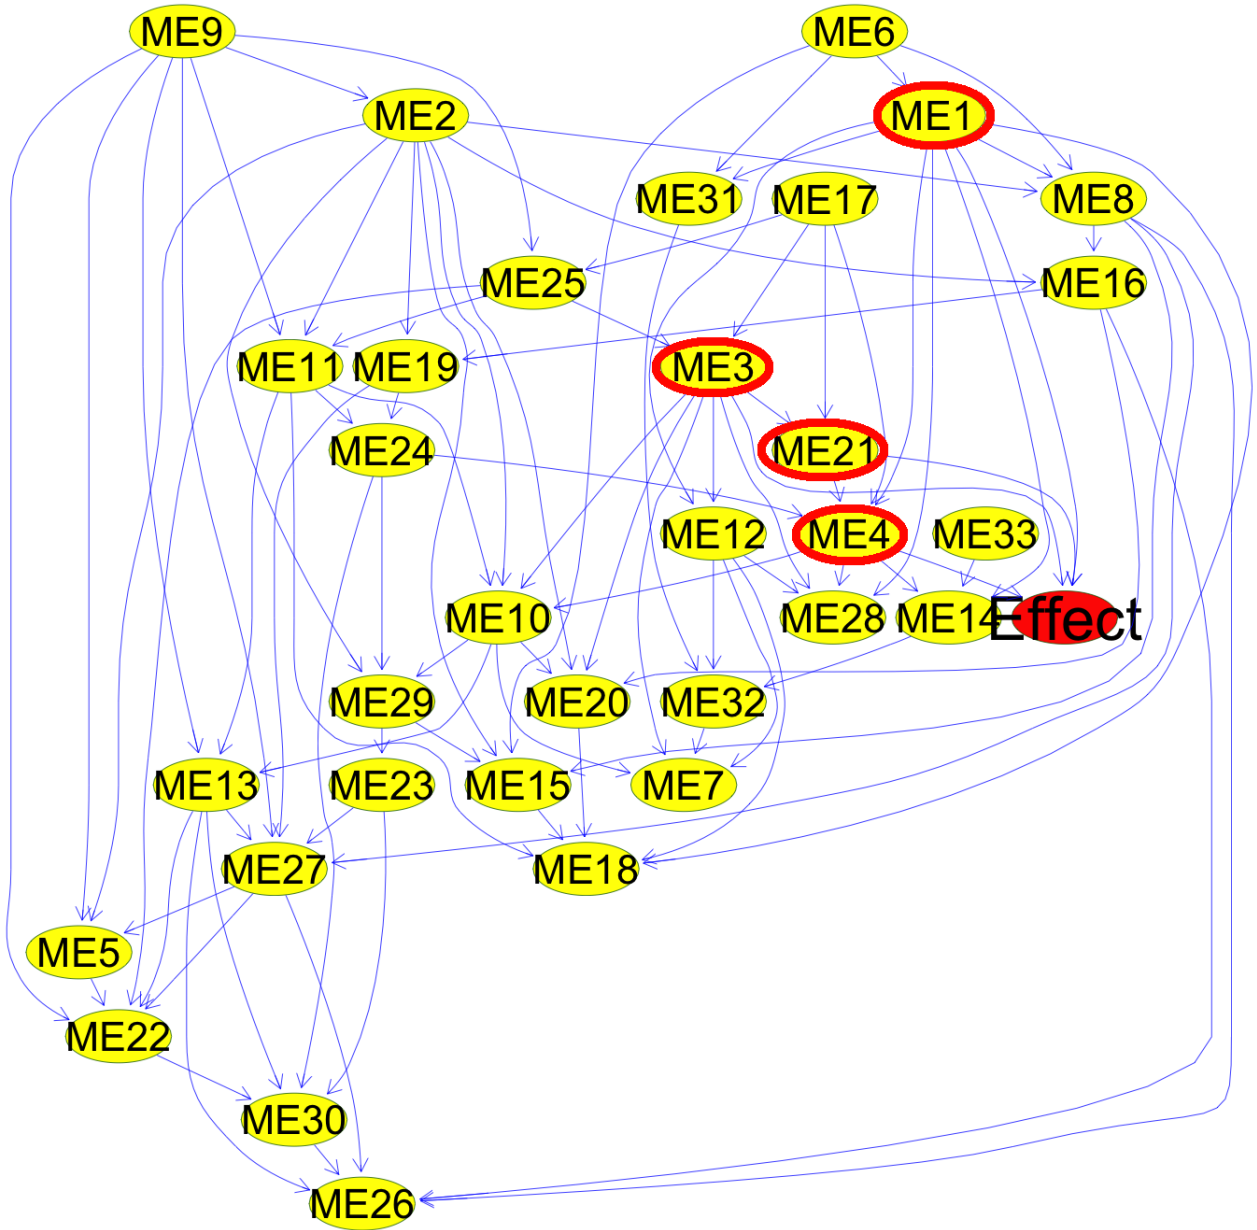

Figure 2



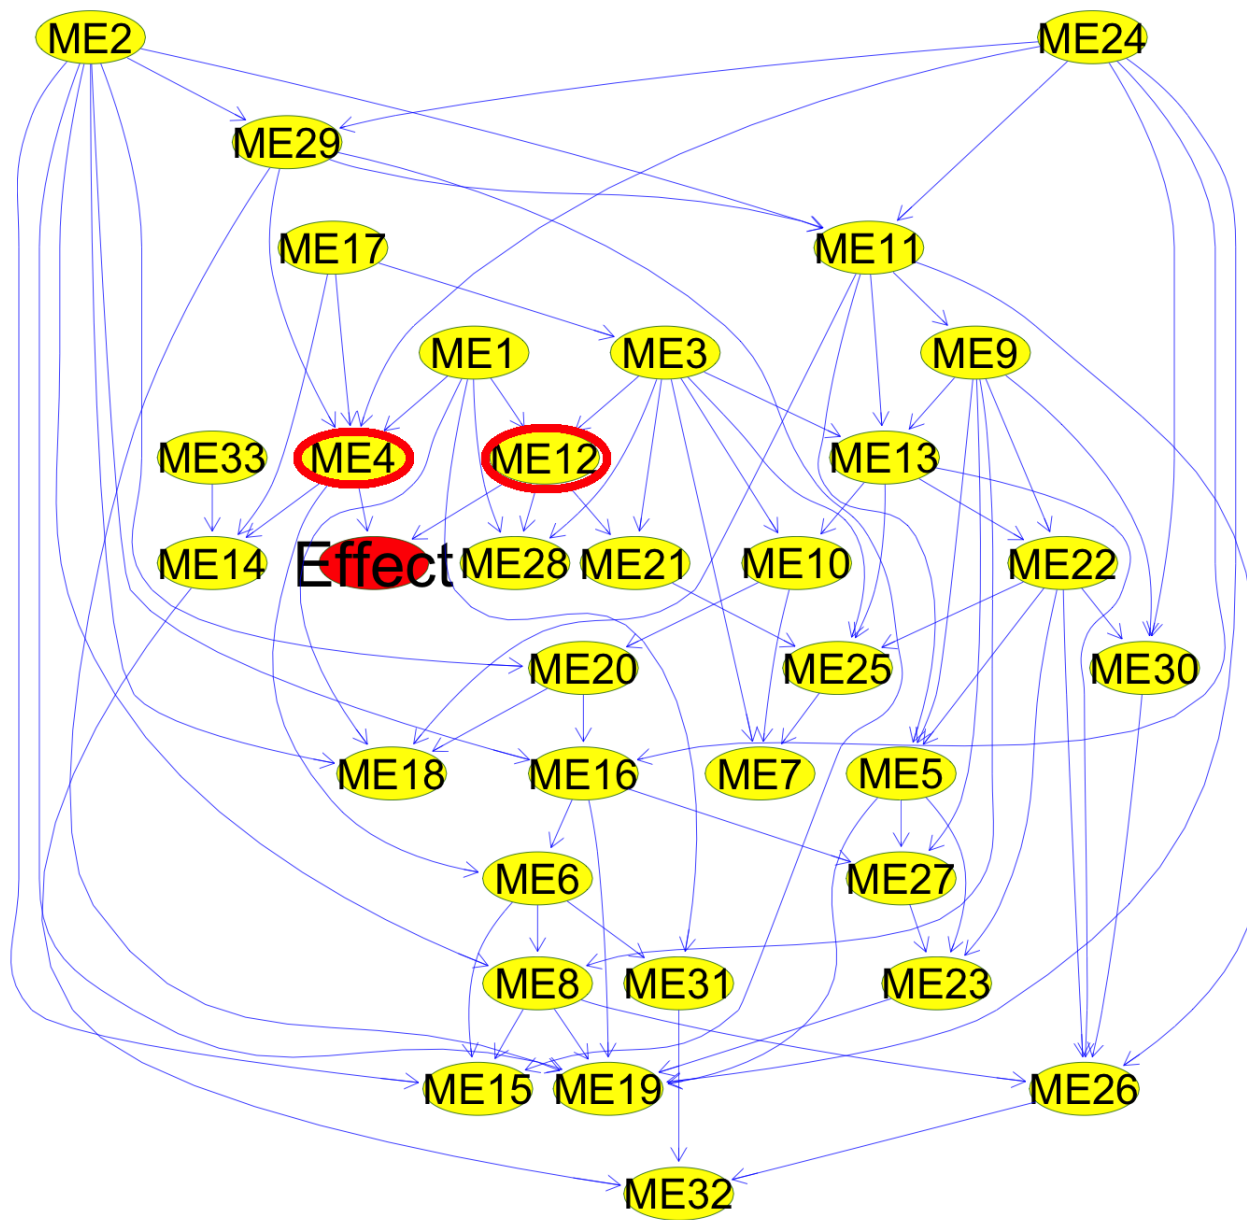

Figure 4

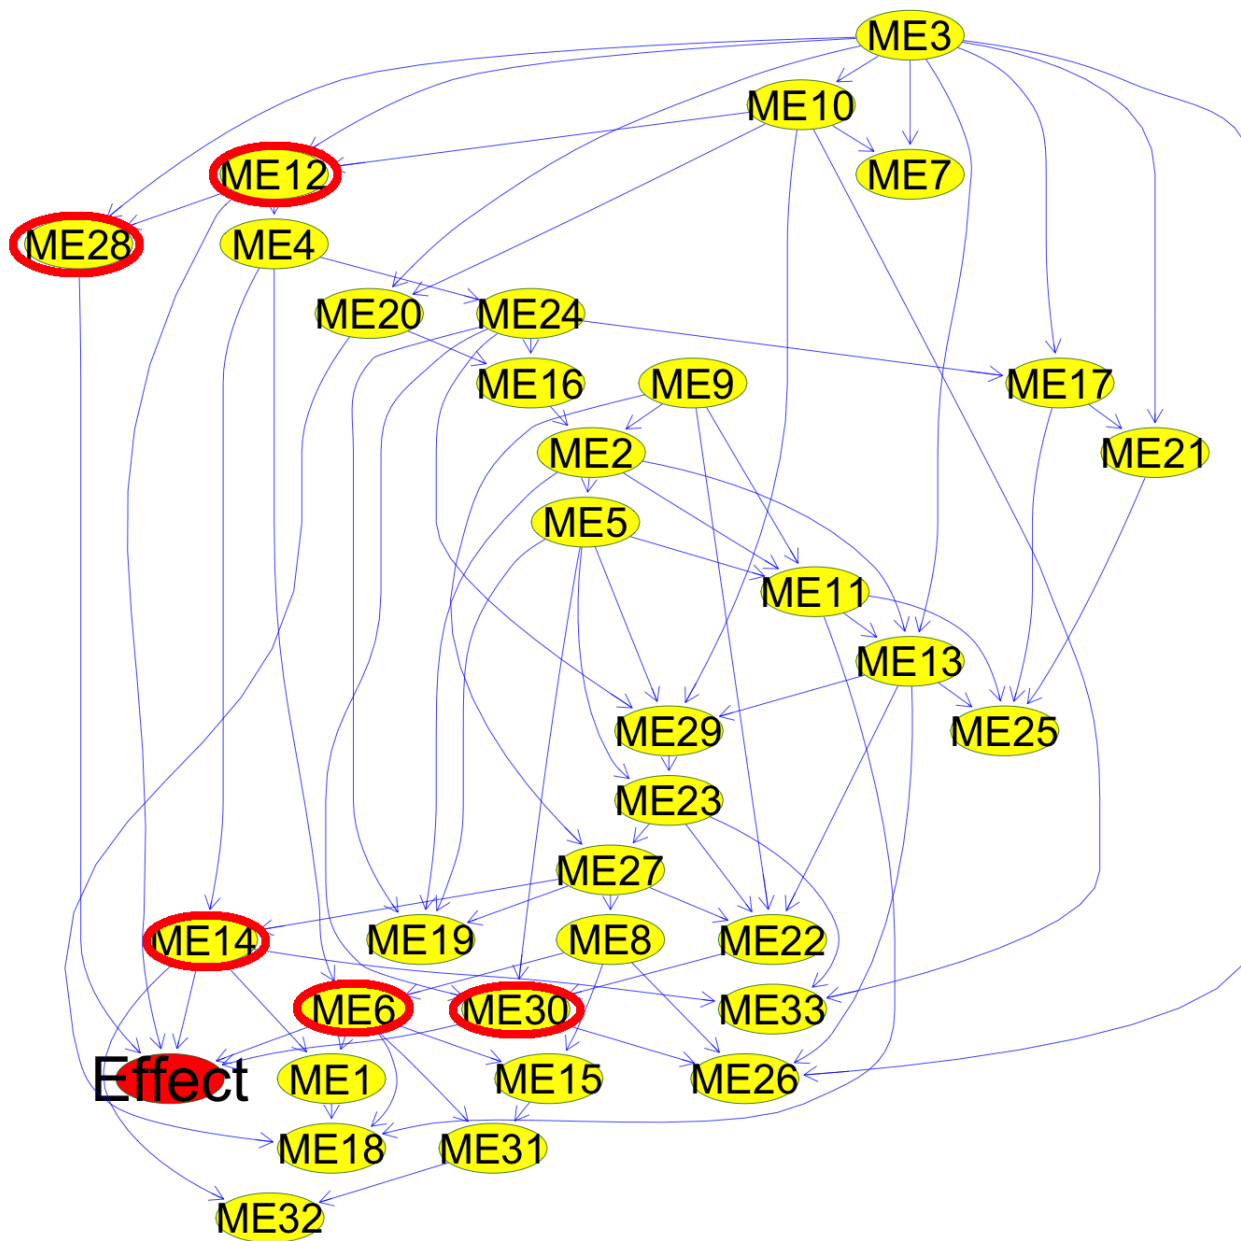

Figure 5
