# Supplementary material for: Applications of Bayesian network models in predicting types of hematological malignancies
Source: PubMed Central journal article supplement (PMC5934387; doi:10.1038/s41598-018-24758-5), 2018-05-03
Supplement: 41598_2018_24758_MOESM5_ESM.pdf [file 41598_2018_24758_MOESM5_ESM.pdf]

# Applications of Bayesian network models in predicting types of hematological malignancies

Rupesh Agrahari<sup>1,+</sup>, Amir Foroushani<sup>1,+</sup>, Thomas Roderick Docking<sup>2</sup>, Linda Chang<sup>2</sup>, Gerben Duns<sup>2</sup>, Monika Hudoba<sup>3</sup>, Aly Karsan<sup>2,‡</sup>, and Habil Zare<sup>2,‡,\*</sup>

<sup>1</sup>Department of Computer Science, Texas State University, San Marcos, Texas, 78666, USA

<sup>2</sup>Department of Pathology and Laboratory Medicine, British Columbia Cancer Agency, Vancouver, British Columbia, V5Z 4E6, Canada

<sup>3</sup>Department of Pathology and Laboratory Medicine, Vancouver General Hospital, Vancouver, British Columbia, V5Z 1M9, Canada

\*zare@txstate.edu

+These authors contributed equally to this work.

‡These senior authors contributed equally to this work.

## Supplementary File 4: The confusion matrices and performance of individual models obtained from 5 subsamples.

```
Partition 1: Confusion matrix and statistics

      Actual
Prediction AML  MDS
      AML 184   7
      MDS  18 157

      Accuracy : 0.9317          95% CI : (0.9008, 0.9553)
      No Information Rate : 0.5519      P-Value [Acc > NIR] : <2e-16

      Kappa : 0.8628          McNemar's Test P-Value : 0.0455

      Sensitivity : 0.9109          Specificity : 0.9573
      Pos Pred Value : 0.9634          Neg Pred Value : 0.8971
      Prevalence : 0.5519          Detection Rate : 0.5027
      Detection Prevalence : 0.5219      Balanced Accuracy : 0.9341

      'Positive' Class : AML
```

**Figure 1. Performance of model 1 on the MILE (training) dataset**

```
Partition 2: Confusion matrix and statistics

      Actual
Prediction AML MDS
      AML 179   6
      MDS  23 158

      Accuracy : 0.9208                95% CI : (0.8882, 0.9463)
No Information Rate : 0.5519          P-Value [Acc > NIR] : < 2.2e-16

      Kappa : 0.8414                McNemar's Test P-Value : 0.002967

      Sensitivity : 0.8861            Specificity : 0.9634
      Pos Pred Value : 0.9676        Neg Pred Value : 0.8729
      Prevalence : 0.5519            Detection Rate : 0.4891
Detection Prevalence : 0.5055        Balanced Accuracy : 0.9248

'Positive' Class : AML
```

**Figure 2. Performance of model 2 on the MILE (training) dataset**

```
Partition 3: Confusion matrix and statistics

      Actual
Prediction AML MDS
      AML 176   9
      MDS  26 155

      Accuracy : 0.9044                95% CI : (0.8695, 0.9325)
No Information Rate : 0.5519          P-Value [Acc > NIR] : < 2.2e-16

      Kappa : 0.8085                McNemar's Test P-Value : 0.006841

      Sensitivity : 0.8713            Specificity : 0.9451
      Pos Pred Value : 0.9514        Neg Pred Value : 0.8564
      Prevalence : 0.5519            Detection Rate : 0.4809
Detection Prevalence : 0.5055        Balanced Accuracy : 0.9082

'Positive' Class : AML
```

**Figure 3. Performance of model 3 on the MILE (training) dataset**

```
Partition 4: Confusion matrix and statistics

      Actual
Prediction AML MDS
      AML 173  10
      MDS  29 154

      Accuracy : 0.8934                95% CI : (0.8572, 0.9231)
No Information Rate : 0.5519          P-Value [Acc > NIR] : < 2.2e-16

      Kappa : 0.7869                McNemar's Test P-Value : 0.003948

      Sensitivity : 0.8564            Specificity : 0.9390
      Pos Pred Value : 0.9454          Neg Pred Value : 0.8415
      Prevalence : 0.5519              Detection Rate : 0.4727
Detection Prevalence : 0.5000          Balanced Accuracy : 0.8977

'Positive' Class : AML
```

**Figure 4. Performance of model 4 on the MILE (training) dataset**

```
Partition 5: Confusion matrix and statistics

      Actual
Prediction AML MDS
      AML 195   9
      MDS   7 155

      Accuracy : 0.9563                95% CI : (0.93, 0.9748)
No Information Rate : 0.5519          P-Value [Acc > NIR] : <2e-16

      Kappa : 0.9115                McNemar's Test P-Value : 0.8026

      Sensitivity : 0.9653            Specificity : 0.9451
      Pos Pred Value : 0.9559          Neg Pred Value : 0.9568
      Prevalence : 0.5519              Detection Rate : 0.5328
Detection Prevalence : 0.5574          Balanced Accuracy : 0.9552

'Positive' Class : AML
```

**Figure 5. Performance of model 5 on the MILE (training) dataset**

```
Confusion matrix and statistics on BCCA data using BN for partition 1:

      Actual
Prediction AML MDS
AML      49    4
MDS      3   18

      Accuracy : 0.9054          95% CI : (0.8148, 0.9611)
No Information Rate : 0.7027      P-Value [Acc > NIR] : 2.607e-05

      Kappa : 0.7706          McNemar's Test P-Value : 1

      Sensitivity : 0.9423          Specificity : 0.8182
Pos Pred Value : 0.9245          Neg Pred Value : 0.8571
Prevalence : 0.7027          Detection Rate : 0.6622
Detection Prevalence : 0.7162      Balanced Accuracy : 0.8802

'Positive' Class : AML
```

**Figure 6. Performance of model 1 on the BCCA (test) dataset**

```
Confusion matrix and statistics on BCCA data using BN for partition 2:

      Actual
Prediction AML MDS
AML      38    7
MDS      14   15

      Accuracy : 0.7162          95% CI : (0.5995, 0.815)
No Information Rate : 0.7027      P-Value [Acc > NIR] : 0.4562

      Kappa : 0.3779          McNemar's Test P-Value : 0.1904

      Sensitivity : 0.7308          Specificity : 0.6818
Pos Pred Value : 0.8444          Neg Pred Value : 0.5172
Prevalence : 0.7027          Detection Rate : 0.5135
Detection Prevalence : 0.6081      Balanced Accuracy : 0.7063

'Positive' Class : AML
```

**Figure 7. Performance of model 2 on the BCCA (test) dataset**

```
Confusion matrix and statistics on BCCA data using BN for partition 3:

      Actual
Prediction AML MDS
      AML  50   8
      MDS   2  14

      Accuracy : 0.8649          95% CI : (0.7655, 0.9332)
      No Information Rate : 0.7027      P-Value [Acc > NIR] : 0.0009218

      Kappa : 0.649              McNemar's Test P-Value : 0.1138463

      Sensitivity : 0.9615          Specificity : 0.6364
      Pos Pred Value : 0.8621      Neg Pred Value : 0.8750
      Prevalence : 0.7027          Detection Rate : 0.6757
      Detection Prevalence : 0.7838      Balanced Accuracy : 0.7990

      'Positive' Class : AML
```

**Figure 8. Performance of model 3 on the BCCA (test) dataset**

```
Confusion matrix and statistics on BCCA data using BN for partition 4:

      Actual
Prediction AML MDS
      AML  52   9
      MDS   0  13

      Accuracy : 0.8784          95% CI : (0.7816, 0.9429)
      No Information Rate : 0.7027      P-Value [Acc > NIR] : 0.0003169

      Kappa : 0.67              McNemar's Test P-Value : 0.0076608

      Sensitivity : 1.0000          Specificity : 0.5909
      Pos Pred Value : 0.8525      Neg Pred Value : 1.0000
      Prevalence : 0.7027          Detection Rate : 0.7027
      Detection Prevalence : 0.8243      Balanced Accuracy : 0.7955

      'Positive' Class : AML
```

**Figure 9. Performance of model 4 on the BCCA (test) dataset**

```
Confusion matrix and statistics on BCCA data using BN for partition 5:

      Actual
Prediction AML MDS
AML      48   8
MDS      4  14

      Accuracy : 0.8378          95% CI : (0.7339, 0.9133)
No Information Rate : 0.7027      P-Value [Acc > NIR] : 0.005718

      Kappa : 0.5904          McNemar's Test P-Value : 0.386476

      Sensitivity : 0.9231          Specificity : 0.6364
      Pos Pred Value : 0.8571          Neg Pred Value : 0.7778
      Prevalence : 0.7027          Detection Rate : 0.6486
      Detection Prevalence : 0.7568      Balanced Accuracy : 0.7797

      'Positive' Class : AML
```

**Figure 10. Performance of model 5 on the BCCA (test) dataset**
